# Supplementary material for: Interaction of a Partially Disordered Antisigma Factor with Its Partner, the Signaling Domain of the TonB-Dependent Transporter HasR
Source: PubMed Central journal article supplement (PMC3984077; doi:10.1371/journal.pone.0089502), 2014-04-11
Supplement: pone.0089502.s001.pdf [file pone.0089502.s001.pdf]

## **Inventory of Supporting Information**

**Figure S1, Figure S2, Figure S3, Figure S4, Figure S5, Table S1, Table S2**

**Figure S1. HasS domain organisation.** TM represents transmembrane helix.

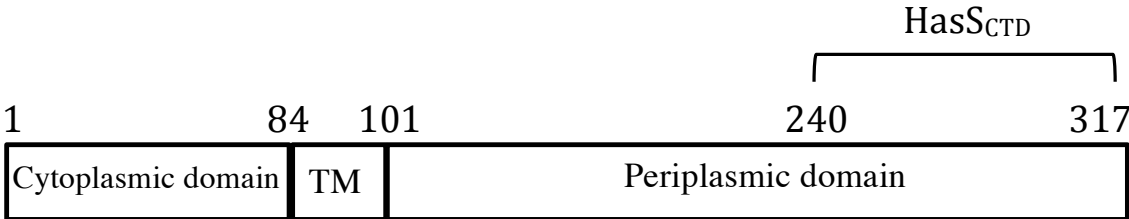

**Figure S2. Purification of HasS<sub>CTD</sub>.** SDS PAGE of inclusion bodies (1) solubilized in 8 M Urea, elution profile and SDS PAGE of fractions (2) collected from the size exclusion column.

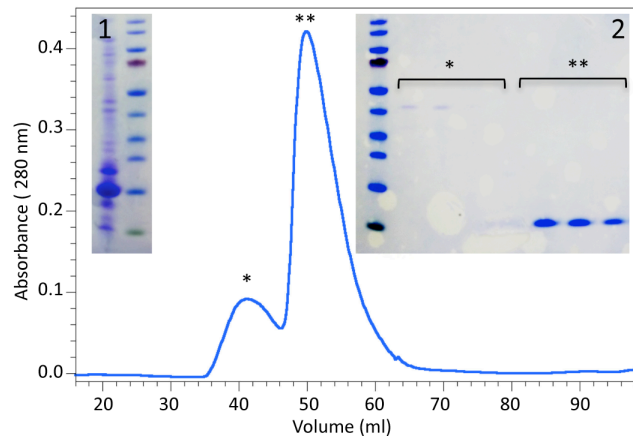

**Figure S3. Summary of secondary C $\alpha$ , C $\beta$  and CO chemical shifts of Has<sub>CTD</sub>.**

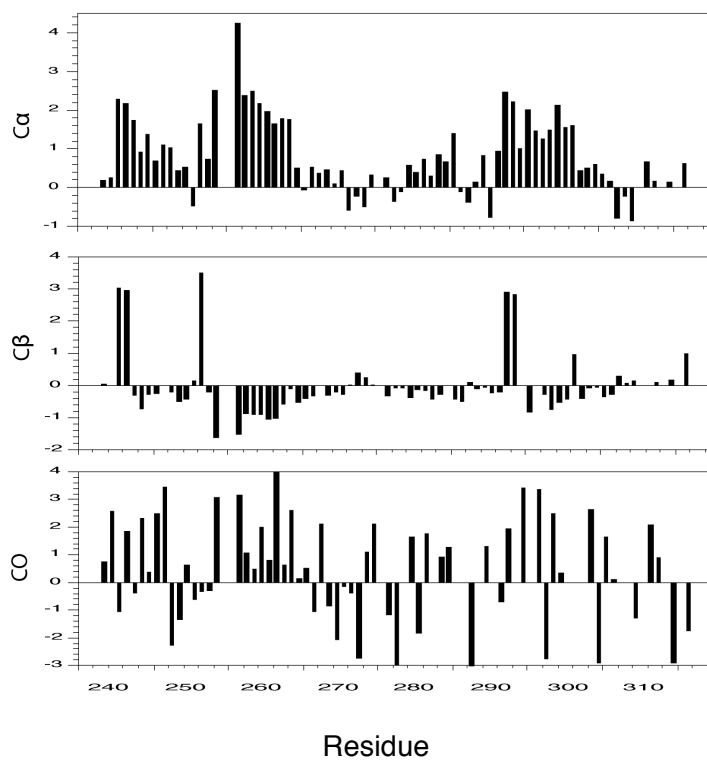

**Figure S4.** Variation of the fluorescence emission of HasS<sub>CTD</sub> upon titration with aliquots of a solution of HasR signaling domain (square) at 1 mM and ribunclease A (triangle) at 1.1 mM. The excitation and emission wavelengths were 297 and 350 nm, respectively.

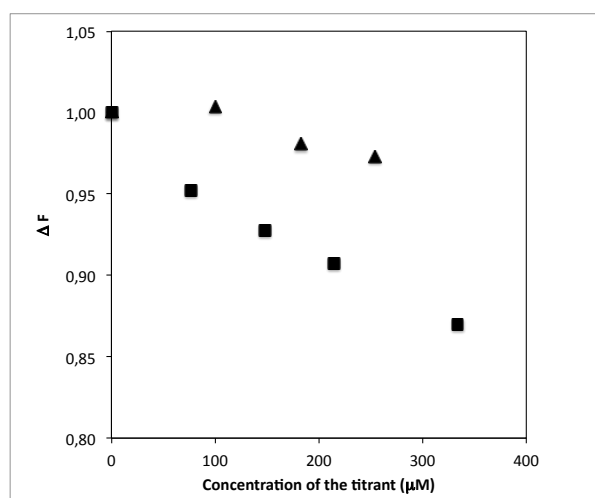

**Figure S5.** Residues of the signaling domain of HasR involved in the interaction with HasS<sub>CTD</sub> are in cyan and those affected by microsecond to millisecond time scale motions (Rex higher than 2.5 s<sup>-1</sup>) are in red.

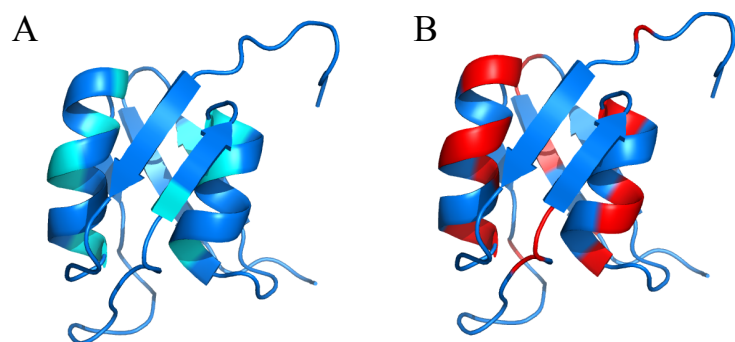

**Table S1: HasS<sub>CTD</sub> chemical shift (in ppm)**

|     |     | H    | N      | C      | CA    | CB    |
|-----|-----|------|--------|--------|-------|-------|
|     | Met | 8.36 | 118.81 | 177.69 | 55.99 | 32.99 |
| 240 | Gly | 8.20 | 109.17 | 176.62 | 45.56 | –     |
| 241 | Asp | 8.11 | 120.47 | 174.14 | 55.26 | 41.35 |
| 242 | Asp | 8.23 | 119.84 | 176.58 | 55.22 | 41.28 |
| 243 | Ala | 8.06 | 122.64 | 177.03 | 54.64 | 18.97 |
| 244 | Trp | 7.91 | 116.66 | 178.76 | 58.50 | 29.02 |
| 245 | Arg | 7.63 | 118.49 | 176.66 | 57.83 | 30.65 |
| 246 | Arg | 7.82 | 117.71 | 178.97 | 57.05 | 30.68 |
| 247 | Gly | 8.03 | 107.47 | 177.14 | 46.32 | –     |
| 248 | Trp | 7.91 | 119.42 | 174.09 | 58.48 | 29.54 |
| 249 | Leu | 7.58 | 117.83 | 175.77 | 55.66 | 41.97 |
| 250 | Val | 7.48 | 117.03 | 176.68 | 62.85 | 32.40 |
| 251 | Ile | 7.64 | 119.90 | 175.65 | 61.14 | 39.05 |
| 252 | Asp | 8.01 | 121.98 | 174.83 | 54.54 | 41.83 |
| 253 | Arg | 7.98 | 117.88 | 175.70 | 57.21 | 30.72 |
| 254 | Gln | 8.29 | 119.86 | 176.68 | 56.70 | 27.90 |
| 257 | Thr | 8.00 | 112.80 | 178.03 | 66.26 | 68.48 |
| 258 | Gln | 7.93 | 120.50 | 176.95 | 58.56 | 28.64 |
| 259 | Ala | 7.91 | 121.87 | 178.15 | 55.22 | 18.37 |
| 260 | Leu | 8.02 | 116.20 | 179.27 | 57.53 | 41.55 |
| 261 | Ala | 7.76 | 120.54 | 178.55 | 54.77 | 18.22 |
| 262 | Gln | 7.70 | 115.91 | 180.17 | 57.78 | 28.51 |
| 263 | Leu | 7.85 | 118.69 | 177.91 | 57.27 | 41.87 |
| 264 | Asn | 7.84 | 115.32 | 177.76 | 54.99 | 38.98 |
| 265 | Arg | 7.55 | 117.76 | 176.23 | 57.01 | 30.40 |
| 266 | Tyr | 7.65 | 119.20 | 176.50 | 58.16 | 38.54 |
| 267 | Arg | 7.93 | 121.28 | 175.70 | 57.08 | 30.60 |
| 268 | Gly | 7.82 | 107.32 | 176.44 | 45.70 | –     |
| 269 | Thr | 7.69 | 112.95 | 174.02 | 62.36 | 69.71 |
| 270 | Arg | 8.07 | 122.62 | 174.11 | 56.42 | 30.72 |
| 271 | Ile | 8.01 | 121.18 | 176.02 | 61.82 | 38.62 |
| 272 | Val | 7.73 | 119.80 | 175.45 | 61.80 | 32.83 |
| 273 | Ala | 7.98 | 125.70 | 174.90 | 52.33 | 19.64 |
| 274 | Val | 7.76 | 117.28 | 176.87 | 61.93 | 33.06 |
| 275 | Asn | 8.15 | 121.85 | 175.06 | 51.62 | 39.11 |
| 277 | Ala | 7.98 | 120.93 | 176.66 | 53.00 | 18.92 |
| 278 | Leu | 7.68 | 118.54 | 174.54 | 55.13 | 42.38 |
| 279 | Arg | 7.86 | 119.86 | 176.83 | 56.37 | 30.85 |
| 280 | Thr | 7.91 | 114.14 | 176.47 | 62.52 | 69.62 |
| 281 | Arg | 8.20 | 122.12 | 174.72 | 56.89 | 30.80 |
| 282 | Thr | 7.90 | 114.15 | 176.47 | 62.52 | 69.86 |
| 283 | Val | 7.95 | 119.81 | 176.83 | 62.98 | 32.38 |
| 284 | Ser | 8.08 | 116.79 | 175.90 | 59.43 | 63.78 |
| 285 | Gly | 8.14 | 109.55 | 175.14 | 45.91 | –     |
| 286 | Val | 7.72 | 118.52 | 174.58 | 63.77 | 32.39 |
| 287 | Phe | 7.76 | 118.27 | 175.36 | 57.79 | 39.24 |
| 288 | Ala | 7.61 | 122.49 | 174.58 | 52.35 | 19.36 |
| 289 | Leu | 7.90 | 119.86 | 177.09 | 55.63 | 42.36 |
| 290 | Asn | 8.20 | 116.98 | 176.61 | 54.08 | 39.03 |

|     |     |      |        |        |       |       |
|-----|-----|------|--------|--------|-------|-------|
| 291 | Lys | 7.83 | 118.55 | 175.03 | 56.06 | 32.98 |
| 292 | Leu | 8.11 | 121.87 | 176.62 | 56.38 | 42.24 |
| 293 | Asp | 8.18 | 118.38 | 177.10 | 55.50 | 41.24 |
| 294 | Asp | 7.95 | 119.69 | 174.62 | 55.41 | 41.17 |
| 295 | Gly | 8.21 | 108.00 | 177.59 | 46.43 | -     |
| 296 | Val | 7.96 | 118.68 | 174.54 | 64.59 | 32.00 |
| 297 | Gly | 8.29 | 108.87 | 177.12 | 46.59 | -     |
| 298 | Ala | 7.85 | 122.99 | 175.07 | 53.89 | 18.98 |
| 299 | Ile | 7.78 | 117.61 | 178.97 | 63.08 | 38.15 |
| 300 | Arg | 8.16 | 121.03 | 176.66 | 58.53 | 30.39 |
| 301 | Gln | 8.02 | 118.86 | 177.54 | 57.70 | 29.10 |
| 302 | Glu | 8.01 | 119.86 | 177.13 | 57.65 | 29.84 |
| 303 | Leu | 7.95 | 119.14 | 177.32 | 55.87 | 42.06 |
| 304 | Ser | 7.77 | 113.69 | 177.04 | 59.04 | 63.97 |
| 305 | Ala | 8.02 | 124.22 | 174.89 | 53.48 | 19.20 |
| 306 | Arg | 7.89 | 117.41 | 178.00 | 56.82 | 30.57 |
| 307 | Gln | 7.86 | 116.92 | 176.11 | 56.23 | 29.24 |
| 308 | Leu | 7.91 | 120.43 | 175.29 | 54.69 | 42.75 |
| 309 | Asn | 8.02 | 119.15 | 177.54 | 52.82 | 39.17 |
| 310 | Leu | 7.91 | 121.80 | 173.97 | 52.86 | 42.60 |
| 312 | Gly | 8.18 | 107.05 | 176.23 | 45.88 | -     |
| 313 | Ile | 7.69 | 118.54 | 177.66 | 61.77 | 39.01 |
| 315 | Leu | 7.82 | 121.88 | 174.36 | 55.59 | 42.63 |
| 317 | Tyr | 7.22 | 121.79 | 174.80 | 58.95 | 39.92 |



**Table S2.** Summary of the NMR constraints used for the structure calculation, the restraint violations and structural statistics for the ensemble of 20 best conformers of the HasR signaling domain.

|                                                 |                 |                                                       |                    |
|-------------------------------------------------|-----------------|-------------------------------------------------------|--------------------|
| <i>NOE-derived constraints:</i>                 | 1141            | <i>Energies (kcal/mol)</i>                            |                    |
| <i>unambiguous:</i>                             | 943             | $E_{\text{noe}}$                                      | $15.5 \pm 3.5$     |
| intraresidue                                    | 420             | $E_{\text{bond}}$                                     | $15.2 \pm 0.9$     |
| sequential                                      | 235             | $E_{\text{angle}}$                                    | $90.4 \pm 6.4$     |
| medium range                                    | 80              | $E_{\text{vdw}}$                                      | $-349.5 \pm 19.2$  |
| long range                                      | 208             | $E_{\text{overall}}$                                  | $-3524.0 \pm 52.3$ |
| <i>ambiguous:</i>                               | 198             | <i>Mean pairwise RMSD (Å) residues 8-82:</i>          |                    |
| intraresidue                                    | 102             | Backbone atoms:                                       | $1.41 \pm 0.39$    |
| sequential                                      | 45              | All heavy atoms:                                      | $2.21 \pm 0.40$    |
| medium range                                    | 11              | <i>For the residues with regular 2ndary structure</i> |                    |
| long range                                      | 40              | Backbone atoms:                                       | $0.81 \pm 0.27$    |
| <i>Hydrogen bonds:</i>                          | 24              | All heavy atoms:                                      | $1.52 \pm 0.25$    |
| <i>DANGLE (<math>\phi, \psi</math>):</i>        | 176             | <i>Ensemble Ramachandran plot residues 8-82:</i>      |                    |
| <i>Total number of experimental. restraints</i> | 1341            | most favoured                                         | 83.7%              |
| <i>Residual distance constraint violations:</i> |                 | additional allowed                                    | 16.7%              |
| $\geq 0.5 \text{ \AA}$                          | $0.28 \pm 0.70$ | generously allowed                                    | 0.0%               |
| $\geq 0.3 \text{ \AA}$                          | $0.87 \pm 1.14$ | disallowed                                            | 0.0%               |
